# Supplementary material for: Highly mesoporous hierarchical nickel and cobalt double hydroxide composite: fabrication, characterization and ultrafast NOx gas sensors at room temperature
Source: Royal Society of Chemistry journal article supplement (doi:10.1039/c3ta14607c), 2014-01-01
Supplement: c3ta14607c1.pdf [file c3ta14607c1.pdf]

# Highly mesoporous hierarchical nickel and cobalt double hydroxide composite: fabrication, characterization and ultrafast NO<sub>x</sub> gas sensors at room temperature

Yunlong Ge<sup>a</sup>, Kan Kan<sup>a,c</sup>, Ying Yang<sup>a</sup>, Ling Zhou<sup>a</sup>, Liqiang Jing<sup>a</sup>, Peikang Shen<sup>d</sup>, Li Li<sup>\*ab</sup> and Keying Shi<sup>\*a</sup>

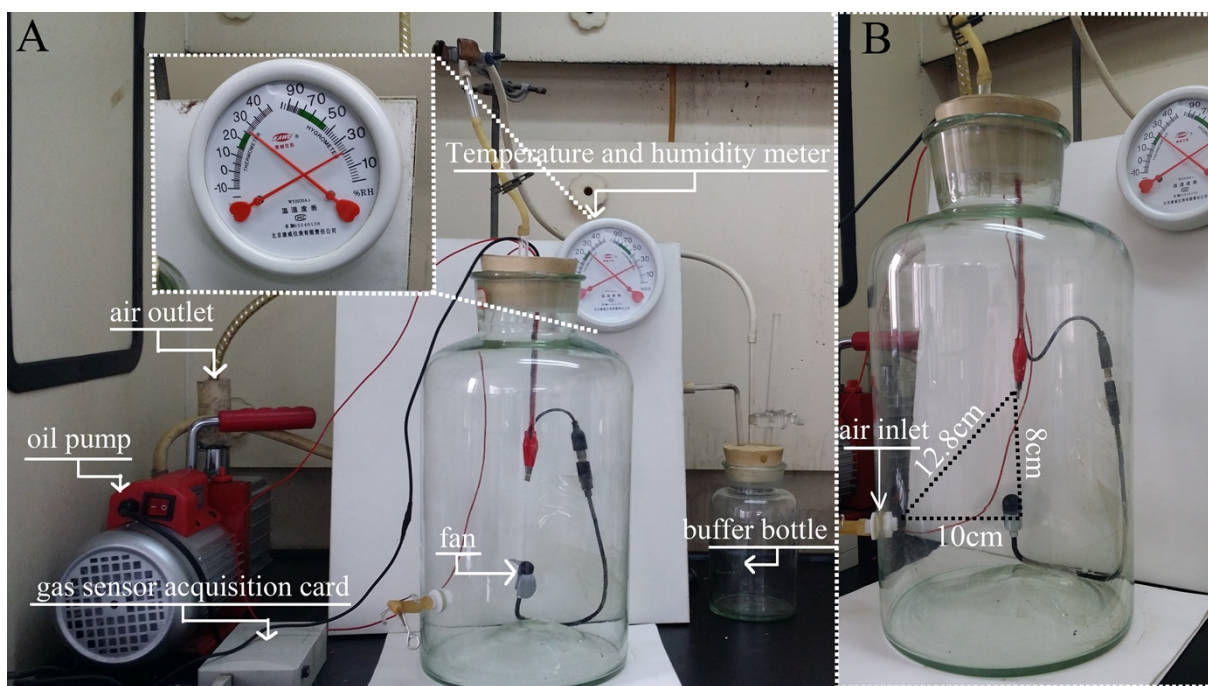

Fig. S1 (A) The images of the test chamber and (B) The distance from the injection point from the surface of the sensor

The test chamber is shown in Fig. S1. The volume of the test chamber (V) is 10.31L. The injected gas volume and concentration of the NO<sub>x</sub> are listed in Table S1. As shown in Fig.1B, the distance from the injection point from the surface of the sensor is about 12.8 cm. The electrode is located in the central of the test chamber over the fan. When the NO<sub>x</sub> was injected into the test chamber, gas molecules were uniformly dispersed in the chamber by using the fan.

Table S1 Volume and concentration of the injected gas

| Injected volume(V <sub>0</sub> ) | The concentration of the NO <sub>x</sub> (V <sub>0</sub> /V) |
|----------------------------------|--------------------------------------------------------------|
| 1000 μL                          | 97.0 ppm                                                     |
| 500 μL                           | 48.5 ppm                                                     |
| 300 μL                           | 29.1 ppm                                                     |
| 100 μL                           | 9.70 ppm                                                     |
| 50 μL                            | 4.85 ppm                                                     |
| 30 μL                            | 2.91 ppm                                                     |
| 10 μL                            | 0.97 ppm                                                     |

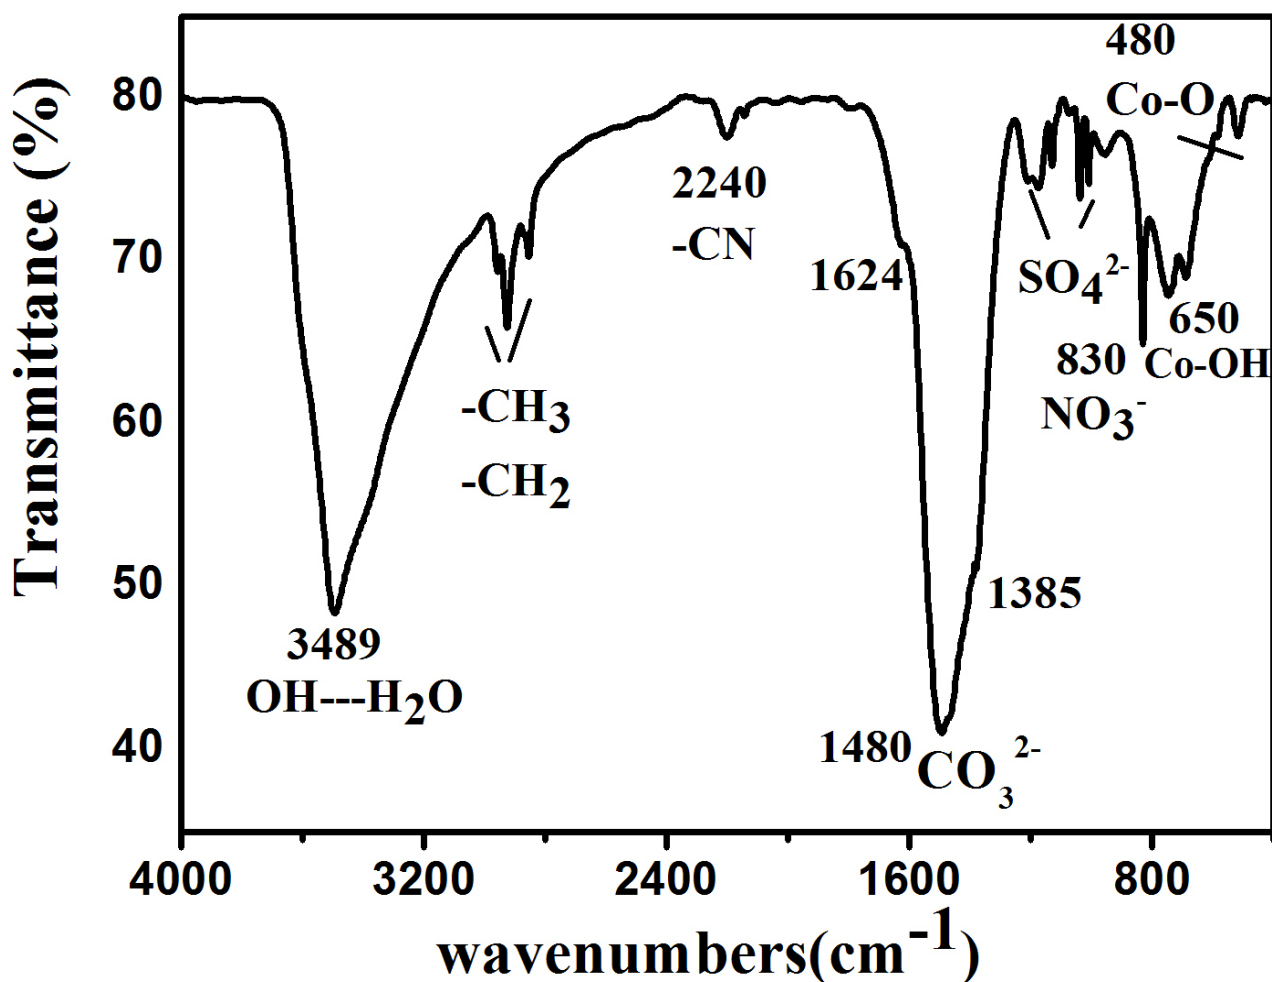

Fig. S2 The FT-IR spectra of the pure  $\alpha$ -Co(OH)<sub>2</sub>

Table S2 The data of FT-IR spectrum for the samples

|                                   |      |                       |                                                               |                                                   |                       |                               |                              |                                                      |                |              |
|-----------------------------------|------|-----------------------|---------------------------------------------------------------|---------------------------------------------------|-----------------------|-------------------------------|------------------------------|------------------------------------------------------|----------------|--------------|
| Wavenumber<br>(cm <sup>-1</sup> ) | 3645 | 3489                  | 2958,<br>2927,<br>2856,                                       | 2239                                              | 1600                  | 1480<br>1487                  | 1386                         | 1130,<br>1037,<br>1009                               | 640            | 480          |
| Functional<br>group               | -OH  | OH---H <sub>2</sub> O | -CH <sub>3</sub> ,<br>-CH <sub>2</sub><br>(DBS <sup>-</sup> ) | C≡N<br>(OCN <sup>-</sup> or<br>CNO <sup>-</sup> ) | C=C<br>(benz-<br>ene) | CO <sub>3</sub> <sup>2-</sup> | NO <sub>3</sub> <sup>-</sup> | SO <sub>4</sub> <sup>2-</sup><br>(DBS <sup>-</sup> ) | Ni-OH<br>Co-OH | Ni-O<br>Co-O |

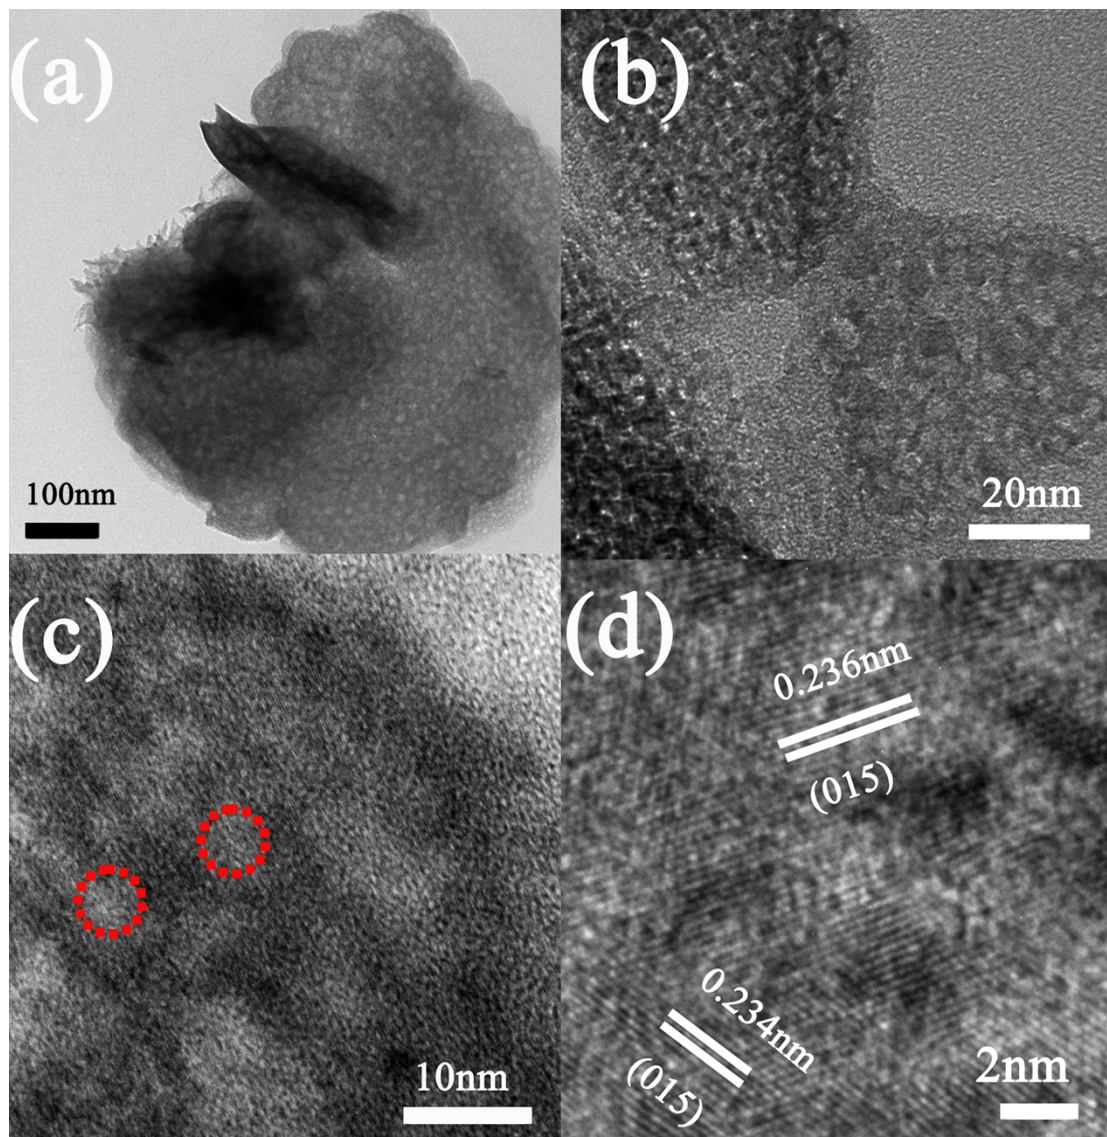

Fig. S3 (a) Low magnification TEM image of hierarchical NCDH-40; (b) TEM image of mesoporous NCDH-40 nanosheet edge, (c), (d) HRTEM images of part of mesoporous multilayer NCDH-40 nanosheets, the (015) plane of  $\alpha$ -Ni(OH)<sub>2</sub> can be seen.

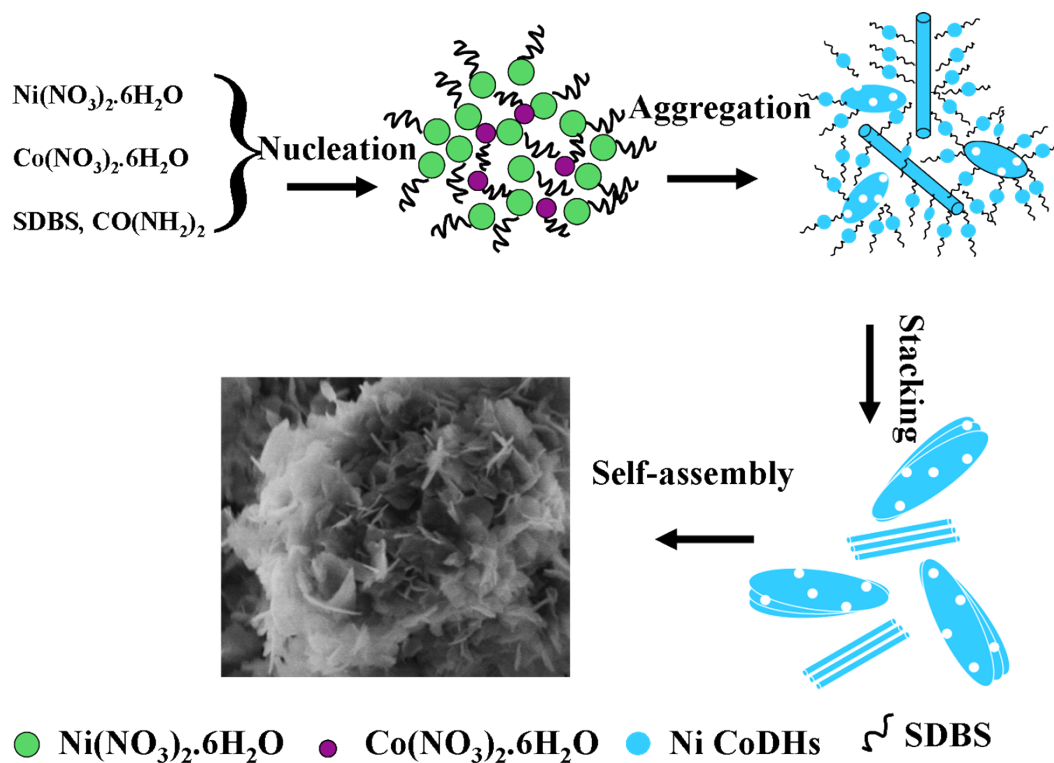

Fig. S4 Schematic illustration of the formation mechanism of NCDHs with highly porous and hierarchical nanostructures.

Table S3 Gas response results of NCDH-20 sensor to  $\text{NO}_x$  at RT in air (RH: 26%)

|                                   |     |      |      |     |      |      |      |
|-----------------------------------|-----|------|------|-----|------|------|------|
| $\text{NO}_x$ Concentration (ppm) | 97  | 48.5 | 29.1 | 9.7 | 4.85 | 2.91 | 0.97 |
| Sensitivity (%)                   | 70  | 62   | 44   | 27  | 16   | 10   | 6    |
| Response time (s)                 | 0.6 | 1.3  | 1.3  | 2   | 8    | 9    | 10   |
